# Supplementary material for: MicroRNA-184 promotes differentiation of the retinal pigment epithelium by targeting the AKT2/mTOR signaling pathway
Source: PubMed Central journal article supplement (PMC5239556; doi:10.18632/oncotarget.10566), 2016-07-13
Supplement: oncotarget-07-52340-s001.pdf [file oncotarget-07-52340-s001.pdf]

## MicroRNA-184 promotes differentiation of the retinal pigment epithelium by targeting the AKT2/mTOR signaling pathway

### SUPPLEMENTARY TABLES

Supplementary Table S1: A collection of differentially expressed miRNAs.

See Supplementary File 1

Supplementary Table S2: Validated miRNAs' targets with experimental support

| miRNA             | mRNAs targeted by miRNAs                                                                                                                                                                                                                                                                                                                                                                                                                           |
|-------------------|----------------------------------------------------------------------------------------------------------------------------------------------------------------------------------------------------------------------------------------------------------------------------------------------------------------------------------------------------------------------------------------------------------------------------------------------------|
| hsa-miR-184       | <i>AKT2, BCL2, EIF2C2, EZR, INPPL1, MYC, NFATC2, SOX7</i>                                                                                                                                                                                                                                                                                                                                                                                          |
| hsa-miR-449a      | <i>BCL2, CCND1, CCNE2, CDC25A, CDK4, CDK6, E2F3, GMNN, HDAC1, HDAC8, HDAC8, LEF1, MET, NOTCH1, SIRT1, WISP2</i>                                                                                                                                                                                                                                                                                                                                    |
| hsa-miR-449b-5p   | <i>CCNE2, CDC25A, CDK4, CDK6, GMNN, HDAC1, MET, SIRT1</i>                                                                                                                                                                                                                                                                                                                                                                                          |
| hsa-let-7e-3p     | <i>COPS6, COPS8, GPS1</i>                                                                                                                                                                                                                                                                                                                                                                                                                          |
| hsa-miR-100-5p    | <i>ATM, BMPR2, CTDSPL, EGR2, FGFR3, FLT1, ID1, IGF1R, MMP13, MTOR, PLK1</i>                                                                                                                                                                                                                                                                                                                                                                        |
| hsa-miR-125b-2-3p | <i>IGF1R</i>                                                                                                                                                                                                                                                                                                                                                                                                                                       |
| hsa-miR-181a-3p   | <i>NANOG, ATM, BCL2, BCL2L11, CDKN1B, CDX2, DDIT4, DUSP5, DUSP6, FOS, GATA6, GPR78, HIPK2, HRAS, KAT2B</i>                                                                                                                                                                                                                                                                                                                                         |
| hsa-miR-181a-5p   | <i>ABCG2, AHR, ATG5, ATM, BCL2, BCL2L11, C12ORF29, CD4, CDKN1B, CDX2, COL16A1, DDIT4, DDX3X, DUSP5, DUSP6, E2F5, EREG, FOS, GATA6, GPR78, HIPK2, HRAS, IFNG, KAT2B, KLF6, KRAS, MAP2K1, MAPK1, MCL1, MOSPD1, MTMR3, NLK, NOTCH, PBX3, PGR, PHACTR2, PHACTR4, PHLDA1, PLAG1, PPP3CA, PRAP1, PRKCD, PROX1, PTPN11, PTPN22, RALA, RAP1B, RGS5, RNF2, SASH1, SIRT1, SRGAP1, STAT3, TERT, TGFBR1, TGFBRAP1, TIMP1, TWIST1, UBL3, WIF1, XIAP, ZNF763</i> |
| hsa-miR-181c-5p   | <i>BCL2, BMPR2, BTBD3, CDX2, DPYSL2, GATA6, IL2, KRAS, MECP2, NLK, NOTCH2, NOTCH4, RAP1B, SIRT1, TRIM2</i>                                                                                                                                                                                                                                                                                                                                         |
| hsa-miR-224-5p    | <i>AP2M1, API5, BCL2, CD40, CDC42, CDH1, CXCR4, DIO1, DPYSL2, EDNRA, EYA4, FOSB, HOXD10, KLK10, KRAS, MBD2, NCOA6, NIT1, PAK2, PEBP1, PHLPP1, PTX3, SERPINF2, SMAD4, TCEAL1, TPD52, TRIB1</i>                                                                                                                                                                                                                                                      |
| hsa-miR-342-3p    | <i>ANKRD49, BMP7, C20orf11, CAMK2N1, CPEB4, DNMT1, GEMIN4, ID4, RMND5A, SREBF1, SREBF2, SYNPO2L, TIAMI</i>                                                                                                                                                                                                                                                                                                                                         |
| hsa-miR-452-5p    | <i>BMI1, CDKN1B, DPYSL2, KRAS, LEF1, MMP2, TCF4, THRB, TM7SF4</i>                                                                                                                                                                                                                                                                                                                                                                                  |

Supplementary Table S3: Primers used in this study.

See Supplementary File 2

Supplementary Table S4: Antibodies used in this study

| Anti-protein                 | Host   | Dilution and application | Supplier                  |
|------------------------------|--------|--------------------------|---------------------------|
| OCT4                         | Rabbit | 1:100, Immunostaining    | Abcam                     |
| SOX2                         | Rabbit | 1:1000, Immunostaining   | Abcam                     |
| SSEA4                        | Mouse  | 1:100, Immunostaining    | Abcam                     |
| TRA-1-60                     | Mouse  | 1:500, Immunostaining    | Abcam                     |
| GAPDH                        | Rabbit | 1:5000, Immunoblotting   | Bioworld                  |
| MERTK                        | Rabbit | 1:1000, Immunoblotting   | Cell Signaling Technology |
| LRAT                         | Rabbit | 1:1000, Immunoblotting   | Abcam                     |
| ZO-1                         | Rabbit | 1:200, Immunoblotting    | Invitrogen                |
| Keratin 18                   | Rabbit | 1:10000, Immunoblotting  | Abcam                     |
| RLBP1                        | Rabbit | 1:1000, Immunoblotting   | Abcam                     |
| $\beta$ -Catenin             | Rabbit | 1:1000, Immunoblotting   | Cell Signaling Technology |
| p-AKT2 <sup>(Ser474)</sup>   | Rabbit | 1:1000, Immunoblotting   | Cell Signaling Technology |
| AKT2                         | Rabbit | 1:1000, Immunoblotting   | Cell Signaling Technology |
| p-mTOR <sup>(Ser2448)</sup>  | Rabbit | 1:1000, Immunoblotting   | Cell Signaling Technology |
| mTOR                         | Rabbit | 1:1000, Immunoblotting   | Cell Signaling Technology |
| p-p70S6K <sup>(Thr389)</sup> | Mouse  | 1:1000, Immunoblotting   | Cell Signaling Technology |
| p70S6K                       | Rabbit | 1:1000, Immunoblotting   | Cell Signaling Technology |
| RPE65                        | Mouse  | 1:250, Immunostaining    | Millipore                 |

Supplementary Table S5: Sequences of mimics and inhibitors used in this study

| Mimic/Inhibitor        | Sequence (5'→3')        |
|------------------------|-------------------------|
| NC-mimic               | UUCUCCGAACGUGUCACGUTT   |
| NC-inhibitor           | CAGUACUUUUGUGUAGUACAA   |
| hsa-miR-184 mimic      | UGGACGGAGAACUGAUAAGGGU  |
| hsa-miR-184 inhibitor  | ACCCUUAUCAGUUCUCCGUCCA  |
| dre-miR-184 mimic      | UGGACGGAGAACUGAUAAGGGC  |
| dre-miR-184 inhibitor  | GCCCUUAUCAGUUCUCCGUCCA  |
| hsa-miR-302d mimic     | UAAGUGCUUCCAUGUUUUGGUGA |
| hsa-miR-302d inhibitor | ACUUUAACAUGGAGGCACUUGC  |
| AKT2-siRNA             | CCATGAATGACTTCGACTA     |
